# Supplementary material for: Distinct immune responses and virus shedding in pigs following aerosol, intra-nasal and contact infection with pandemic swine influenza A virus, A(H1N1)09
Source: Springer Nature journal article supplement (doi:10.1186/s13567-016-0390-5), 2016-10-20

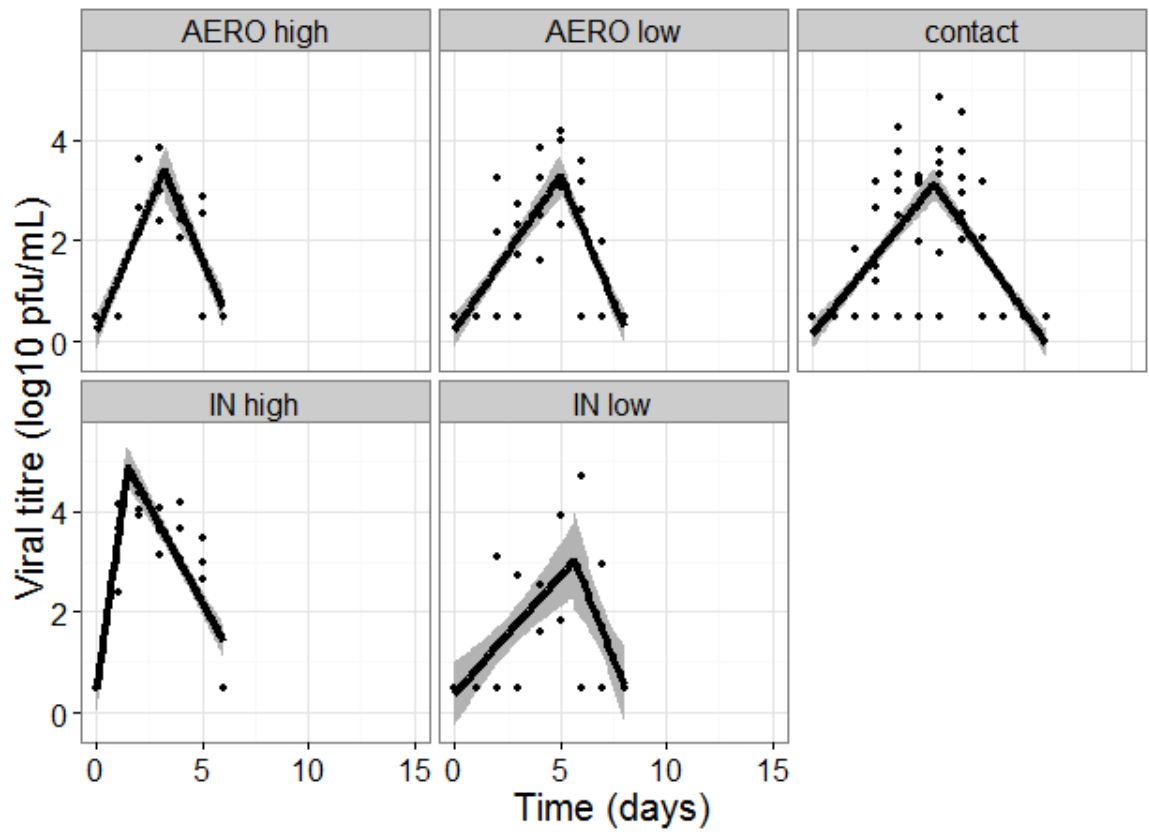

Supplement: MOESM1 [file 13567_2016_390_MOESM1_ESM.pdf]
